# Supplementary material for: Modeling the Invasion of the Large Hive Beetle, Oplostomusfuligineus, into North Africa and South Europe under a Changing Climate
Source: MDPI journal article supplement (doi:10.3390/insects12040275), 2021-03-24
Supplement: s1 [file s1]

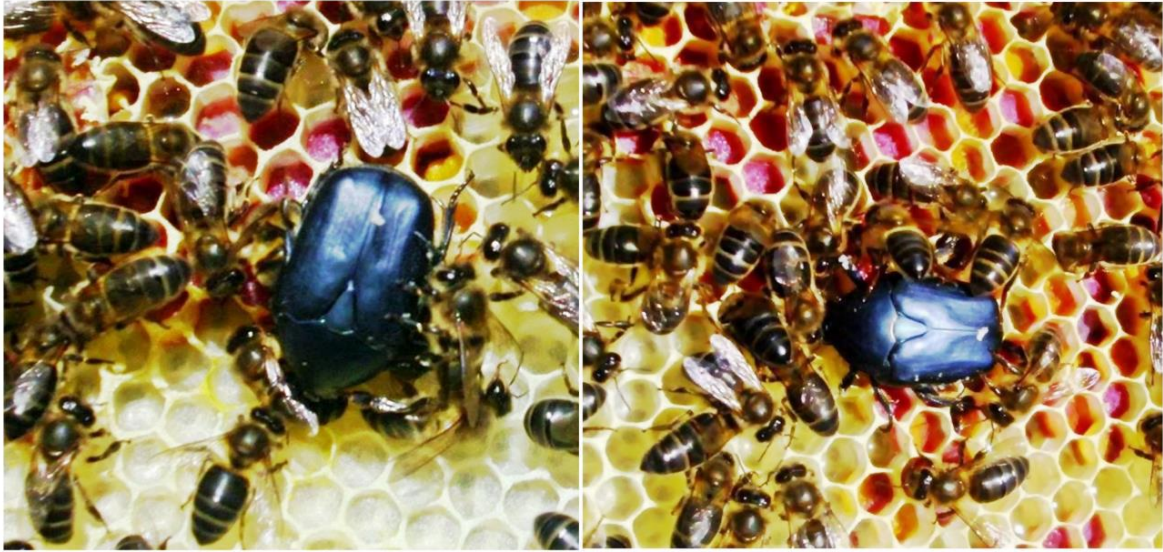

**Figure S1:** Large Hive Beetle (LHB) (*Oplostomus fuliginus*) invading honeybee hive in north Tunisia

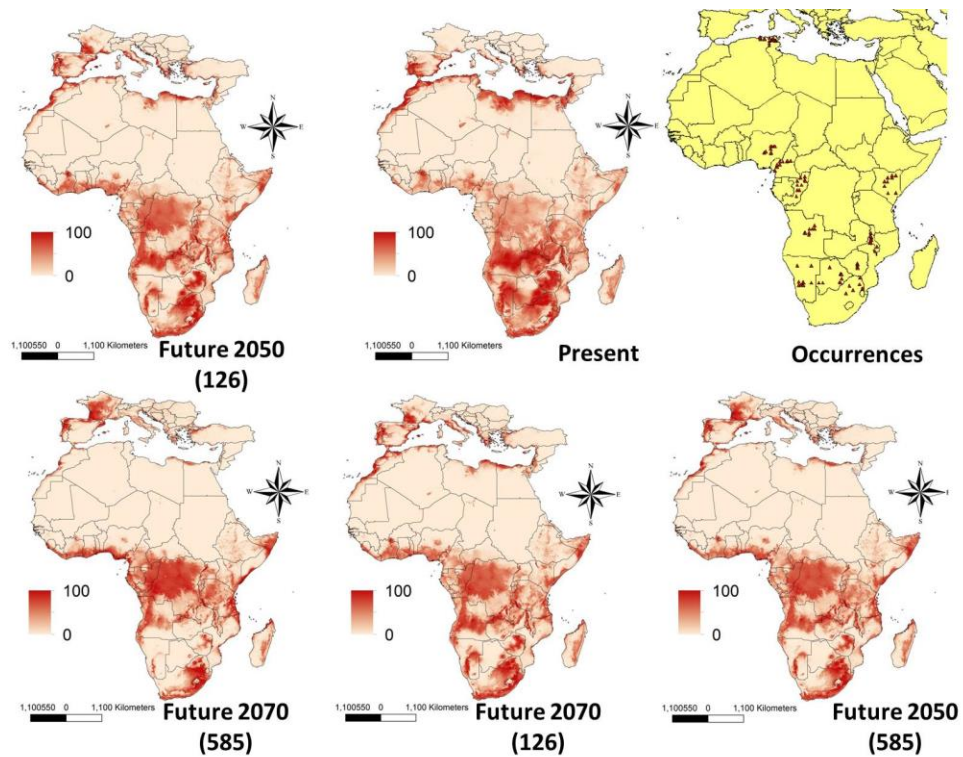

**Figure S2:** Habitat suitability variation in presence/absence classes for predictive current and future distribution of (LHB) and Summary of occurrence records map
